# Supplementary material for: Synthesis of water-dispersible, plate-like perovskites and their core–shell nanocrystals
Source: Royal Society of Chemistry journal article supplement (doi:10.1039/d0ra00657b), 2020-01-01
Supplement: d0ra00657b1.pdf [file d0ra00657b1.pdf]

**Electronic Supplementary Information**

**Synthesis of water-dispersible, plate-like perovskites  
and their core–shell nanocrystals**

Muneharu Minakawa, Yoshiro Imura and Takeshi Kawai\*

Department of Industrial Chemistry, Tokyo University of Science  
1-3 Kagurazaka, Shinjuku-ku, Tokyo, 162-8601, Japan  
[kawai@ci.kagu.tus.ac.jp](mailto:kawai@ci.kagu.tus.ac.jp)

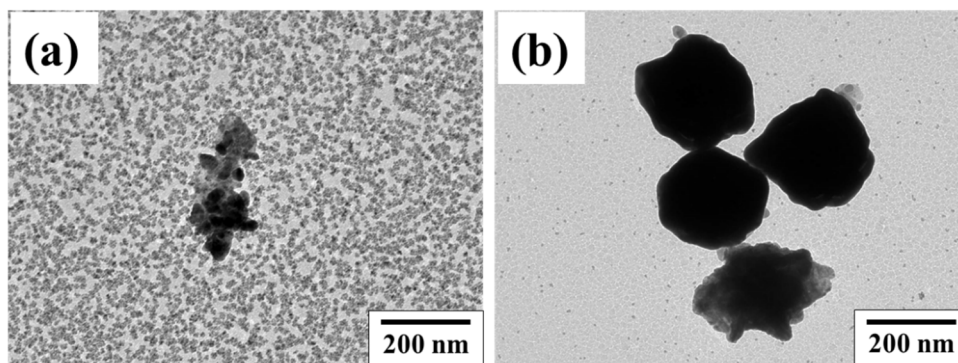

**Figure S1.** TEM images of nanocrystals after reducing (a)  $\text{K}_2\text{PtCl}_4$  and (b)  $\text{HAuCl}_4$  in water containing  $(\text{CH}_3\text{NH}_3)_2\text{PdCl}_4$  perovskite.

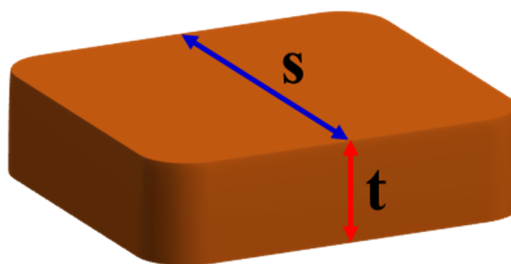

**Figure S2.** Schematic illustration of a plate-like nanocrystal.

**Table S1.** Amounts of C, H, N, Pd and Cl in 7.5 mg of  $(\text{C18AAH}_2)\text{PdCl}_4$  determined by CHN elemental analysis and ICP-MS.

|           | CHN<br>(wt%) | ICP-MS<br>(wt%) | Amount of<br>substance<br>( $\times 10^{-5}$ mol) |
|-----------|--------------|-----------------|---------------------------------------------------|
| <b>C</b>  | <b>44.85</b> | -               | <b>28.0</b>                                       |
| <b>H</b>  | <b>8.16</b>  | -               | <b>60.7</b>                                       |
| <b>N</b>  | <b>9.39</b>  | -               | <b>5.02</b>                                       |
| <b>Pd</b> | -            | <b>14.4</b>     | <b>1.01</b>                                       |
| <b>Cl</b> | -            | <b>18.6</b>     | <b>3.92</b>                                       |

The elemental ratios determined by combined CHN elemental analysis and ICP-MS are in agreement with those determined theoretically.

**Table S2.** FT-IR band positions of the plate-like nanocrystals. [ $\text{cm}^{-1}$ ]

|                                         | CH <sub>2</sub> stretching |           | amide I | amide II |
|-----------------------------------------|----------------------------|-----------|---------|----------|
|                                         | antisymmetric              | symmetric |         |          |
| (C18AAH <sub>2</sub> )PdCl <sub>4</sub> | 2922                       | 2852      | 1664    | 1552     |
| C18AAH <sub>2</sub> Cl <sub>2</sub>     | 2922                       | 2852      | 1662    | 1554     |
| C18AA                                   | 2918                       | 2849      | 1646    | 1546     |

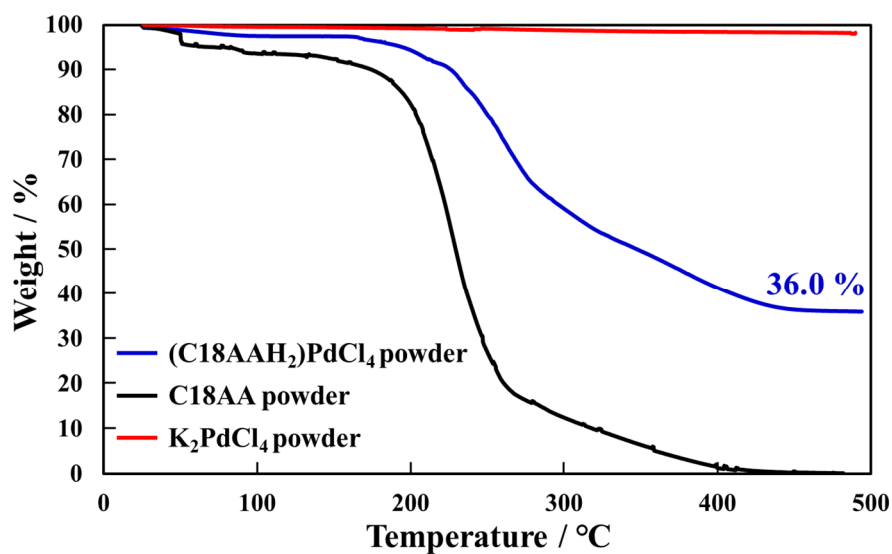

**Figure S3.** TG thermograms of (C18AAH<sub>2</sub>)PdCl<sub>4</sub>, C18AA and K<sub>2</sub>PdCl<sub>4</sub> powders.

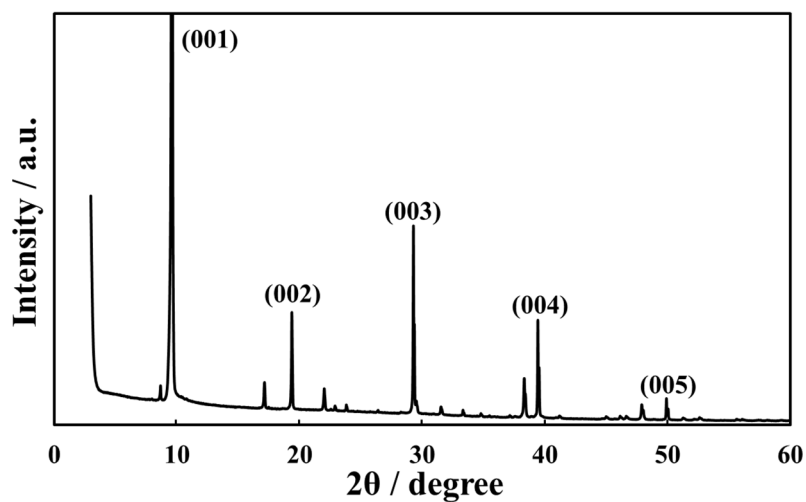

**Figure S4.** XRD pattern of (CH<sub>3</sub>NH<sub>3</sub>)<sub>2</sub>PdCl<sub>4</sub>.

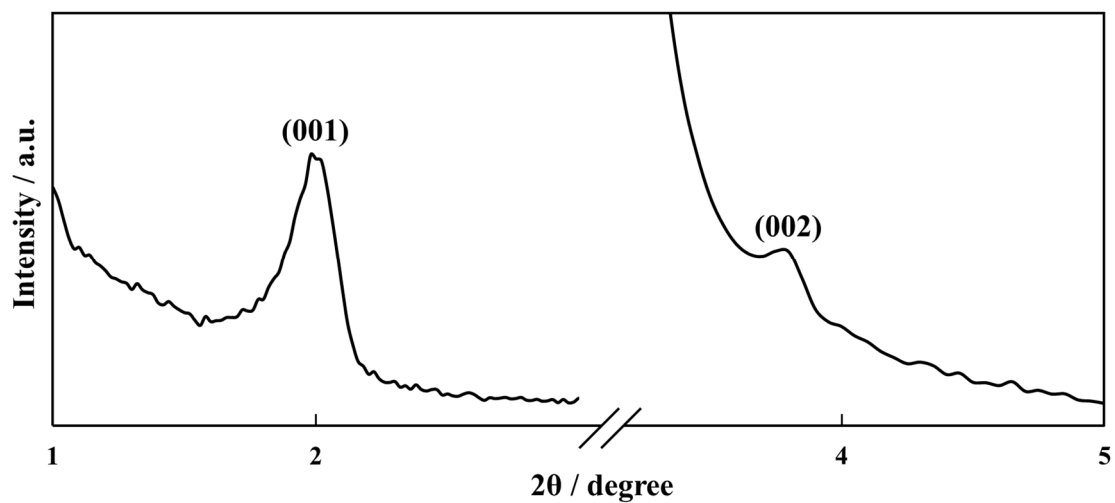

**Figure S5.** XRD pattern of  $(\text{C18AAH}_2)\text{PdCl}_4$ .

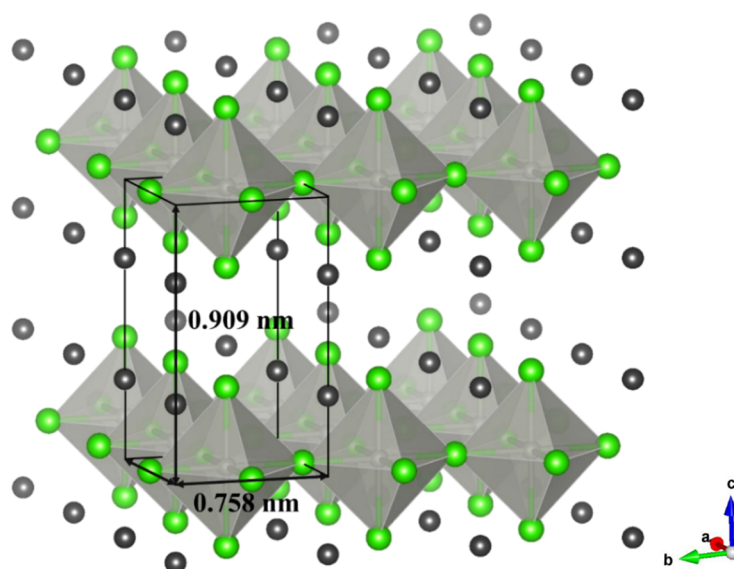

**Figure S6.** 3D image of the crystal structure of  $(\text{CH}_3\text{NH}_3)_2\text{PdCl}_4$ .

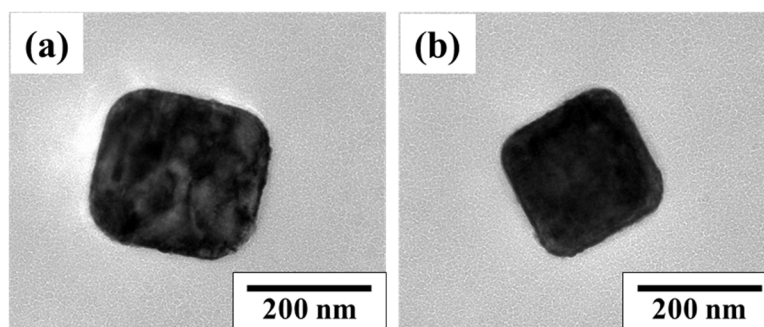

**Figure S7.** TEM images of plate-like nanocrystals prepared using (a) C16AA and (b) C14AA.

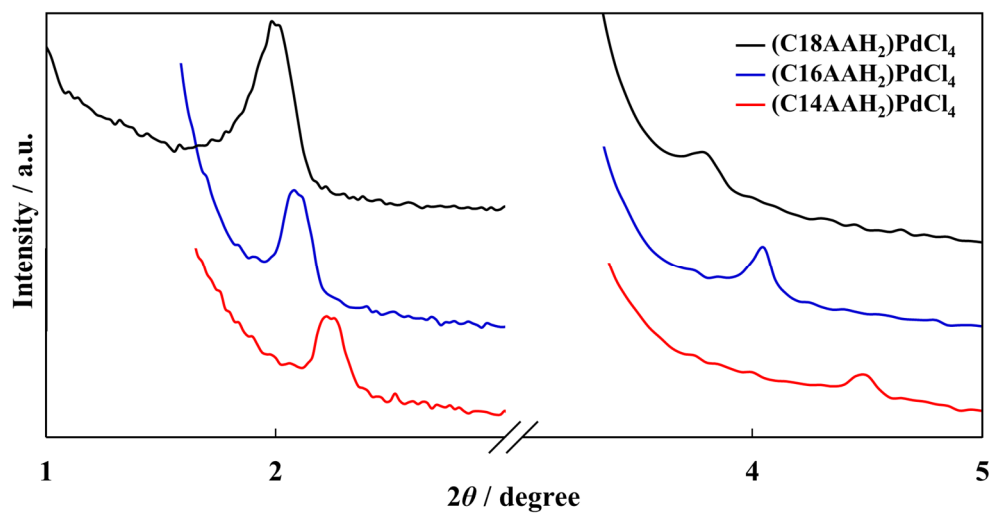

**Figure S8.** XRD patterns of  $(\text{CnAAH}_2)\text{PdCl}_4$ .

**Table S3.** The  $d$  spacings of plate-like nanocrystals prepared from C16AA and C14AA.

|       | $\theta/\text{deg}$ |        | $d$ spacing<br>/nm | CnAA layer<br>length/nm | CnAA<br>molecular<br>length/nm <sup>ref</sup> |
|-------|---------------------|--------|--------------------|-------------------------|-----------------------------------------------|
|       | first               | second |                    |                         |                                               |
| C18AA | 1.96                | 3.88   | 4.50               | 3.74                    | 2.8                                           |
| C16AA | 2.08                | 4.05   | 4.24               | 3.48                    | 2.6                                           |
| C14AA | 2.24                | 4.50   | 3.94               | 3.18                    | 2.4                                           |

Ref : C. Morita, H. Tanuma, C. Kawai, Y. Ito, Y. Imura, and T. Kawai, *Langmuir*, 2013, **29**, 1669-1675.

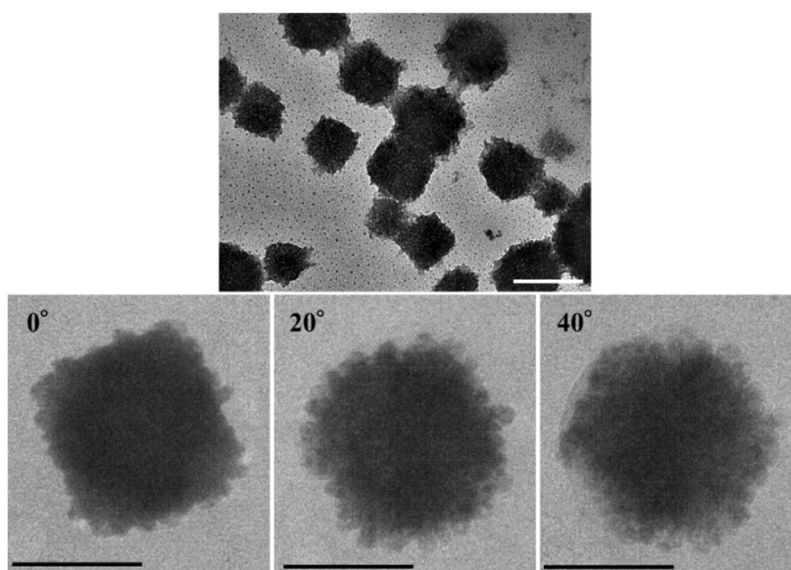

**Figure S9.** TEM images of  $(\text{C18AAH}_2)\text{PdCl}_4@\text{Pt}$  core-shell nanocrystals. Scale bar:100 nm.

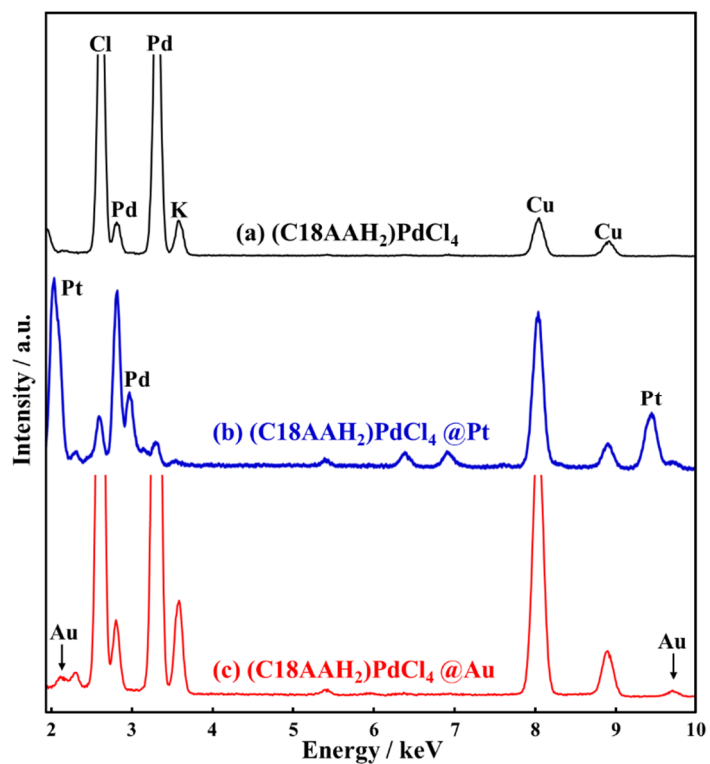

**Figure S10.** TEM-EDS spectra of (a)  $(\text{C18AAH}_2)\text{PdCl}_4$ , (b)  $(\text{C18AAH}_2)\text{PdCl}_4@\text{Pt}$  and (c)  $(\text{C18AAH}_2)\text{PdCl}_4@\text{Au}$  core-shell nanocrystals.

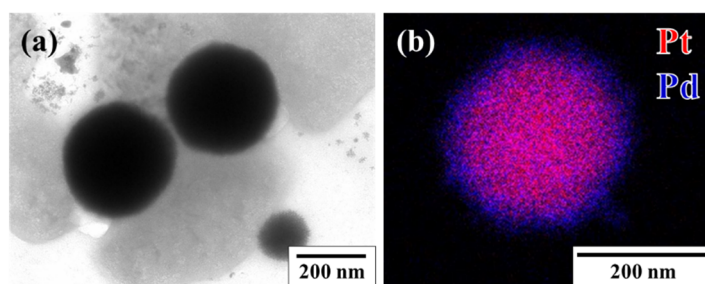

**Figure S11.** TEM image and scanning TEM elemental map of spherical products obtained when the molar ratio of AscA :  $\text{K}_2\text{PtCl}_4$  was 1.5:1.



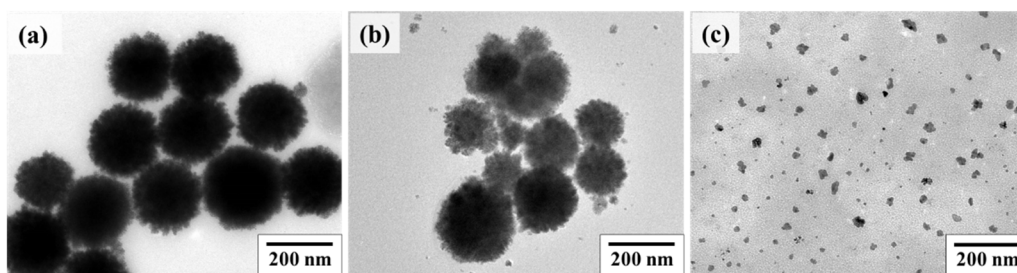

**Figure S12.** TEM images of the spherical products obtained when the molar ratio of AscA:K<sub>2</sub>PtCl<sub>4</sub> was (a) 6:1, (b) 12:1 and (c) 30:1.

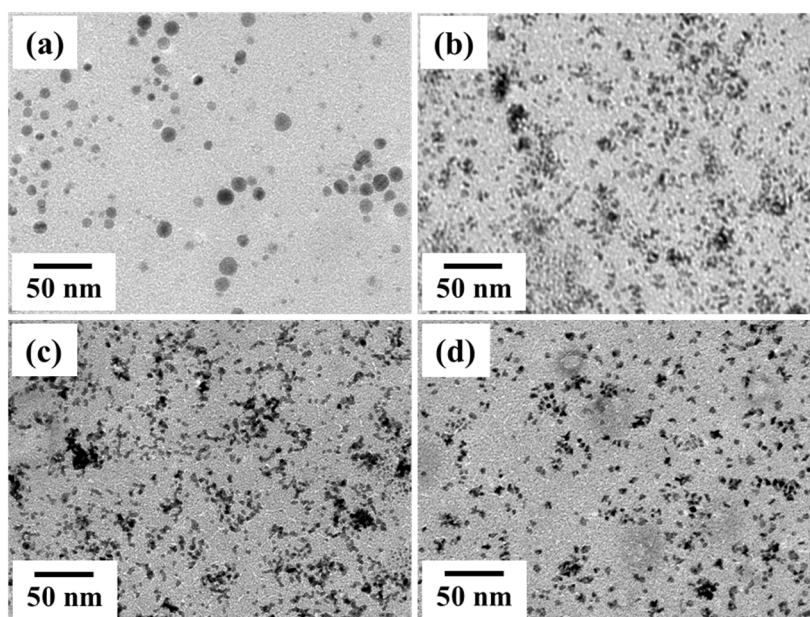

**Figure S13.** TEM images of Pt nanocrystals obtained when the molar ratio of NaBH<sub>4</sub>:K<sub>2</sub>PtCl<sub>4</sub> was (a) 3:1, (b) 6:1, (c) 12:1 and (d) 30:1.

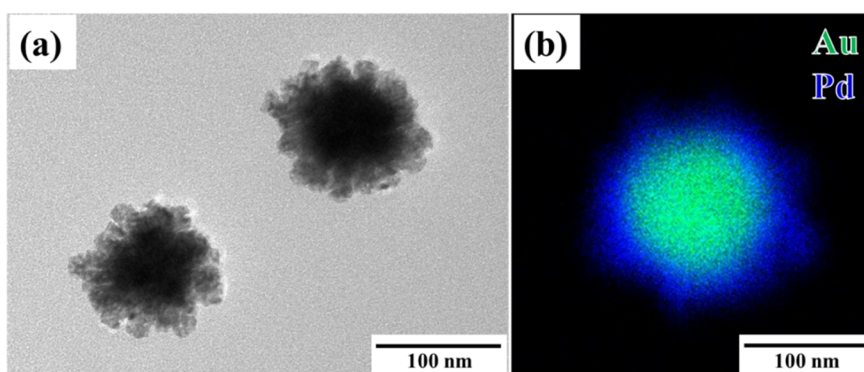

**Figure S14.** (a) TEM image and (b) scanning TEM map of Au@Pd core-shell nanoparticles obtained when the molar ratio of AscA:HAuCl<sub>4</sub> was 3:1.
